# Supplementary material for: The superior response speed of table tennis players is associated with proactive inhibitory control
Source: PeerJ. 2022 May 20;10:e13493. doi: 10.7717/peerj.13493 (PMC9126139; doi:10.7717/peerj.13493)
Supplement: Supplemental Information 1 [file peerj-10-13493-s001.xlsx]

## Sheet: raw RT data
	no-cue/mixed	CTOA-100	CTOA-200	CTOA-300	CTOA-400	CTOA-500	no-cue/baseline
1	299.38	290.5	252.5	255.91	248.6	238.65	242		1:experimental group
1	343.64	367.14	299.31	263.64	243.18	246.82	242.05		2:control group
1	324.53	327.31	262.64	244.06	250.72	240.18	255.68
1	384.76	357.14	311.03	278.97	268.63	271.32	255.83
1	365.45	357.56	292.77	268.32	241.18	251.17	261.26
1	372.06	389.53	333.35	311.53	293.74	291.73	265.31
1	338.31	360.36	288.85	255.38	243.17	244.59	267.48
1	352	328.86	287.97	268.41	263	253.26	269.1
1	348.76	324.66	289.22	258.47	238.29	244.17	269.42
1	344.46	341.86	290	253.38	234.25	226.77	271.3
1	367.1	361.8	313.2	267.23	254.06	244.03	272.84
1	355.01	324.21	282.25	253.66	252.76	251.15	274.5
1	351.69	339.08	283.66	249.43	265.21	254.03	276.67
1	342.9	312.8	261.15	252.76	244.56	244	277.44
1	323.42	298.14	271.21	251.45	242.47	247.7	285.42
1	436.44	396.14	349.97	323.83	303.43	291.85	289.46
1	371.66	370.64	327.13	297.84	267.12	283.72	290.84
1	340.94	305	278.11	274.57	267.14	269.08	293.01
1	381.95	360.28	333.83	274.13	261.86	265.09	295.09
1	358.76	324.46	306.55	290.91	296.79	296.13	295.94
1	341.74	355.39	310.69	296	285.58	279.69	298.99
1	407.11	392	340.22	317.39	327.06	328.86	300.11
1	362.38	364.12	308.75	276.06	268.61	285.67	302.5
1	425.87	418.19	415.68	400.34	383.26	382.18	311.3
1	418.36	405.17	373.61	336.09	317.5	309.31	320.53
1	437.41	425.89	373.41	348.65	334.5	337.91	323.52
1	391.17	399.83	346.31	344.03	319.26	321.59	349.7
2	361.6	342.6	278.59	244.68	229.47	234.69	260.09
2	376.6	355.49	322.86	286.29	282.09	279.26	266.73
2	393.54	395.97	343.73	302.06	303.8	305.12	270.31
2	387.31	383.89	311	270.23	236.49	238.21	275.58
2	351.71	321.03	299.94	278.29	272.91	264.97	276.4
2	367.25	366.82	312.28	281.18	278.26	275.18	276.68
2	349.86	349.91	301.41	270.69	272.82	279.18	277.48
2	375.08	377.8	329.24	282.82	271.53	268.06	278.16
2	372.89	320.17	293.94	267.03	253.24	244.37	278.38
2	394.07	387.92	345.59	307.17	306.41	324.06	279.44
2	382.24	371.76	314.47	284.64	284.76	284.84	280.77
2	344.42	303.12	276.85	271.3	259.48	257.38	285.39
2	370.4	416.68	366.81	338.03	341.09	351	288.34
2	377.64	353.71	297.19	260.31	255.66	254.74	289.56
2	438.39	416.97	351.91	332.97	305.17	315.78	294.84
2	378.31	316.35	286.86	268.77	273.03	266.83	297.33
2	386.55	386.6	328	277.12	276.28	271.79	300.32
2	383.24	385.47	334.91	302.91	298.24	291.75	302.5
2	415.42	391.19	396.71	342.88	337.68	333.88	303.68
2	423.87	416.42	364.83	326.53	308.06	312.69	309.09
2	405.11	394.08	321.97	275.34	247.69	261.21	311.18
2	425.87	438.49	415.68	395.34	383.26	382.18	311.3
2	408.22	367.92	328.6	284	268.06	260.03	320.67
2	444.69	424.86	377.26	339.46	321.4	328.66	331.27
2	462.03	437.4	366.66	316.29	283.77	284.66	332.3
2	462.36	426.97	359.53	326.44	295.28	300.91	335.14
2	428.63	388.36	350.59	298.17	297.89	303.55	338.59
